# Supplementary material for: Enhanced hydrogen storage properties of LiAlH4 catalyzed by CoFe2O4 nanoparticles
Source: Royal Society of Chemistry journal article supplement (doi:10.1039/c4ra00841c), 2014-01-01
Supplement: c4ra00841c1.pdf [file c4ra00841c1.pdf]

## Supplementary Information

### *Enhanced Hydrogen Storage Properties of LiAlH<sub>4</sub> Catalyzed by CoFe<sub>2</sub>O<sub>4</sub> Nanoparticles*

Ziliang Li, Fuqiang Zhai, Qi Wan, Zhaojiang Liu, Jiawei Shan, Ping Li, Alex A.

Volinsky, Xuanhui Qu

Firstly, about 2.0g pure LiAlH<sub>4</sub> was milled in a high-energy modeled QM-3B Spex mill with a ball to powder weight ratio of 20:1 at the rate of 1200 rpm for 30 min. And then the milled LiAlH<sub>4</sub> was mixed with CoFe<sub>2</sub>O<sub>4</sub> nanoparticles by using a mortar (120mm, agate) in the glove box in order to prevent the temperature increasing and guarantee the homogeneity of mixture. After that, 0.3g mixture was loaded into PCT equipment and then heated at 100 °C under vacuum condition for 2h. Finally, the phase structure of heated sample was detected by XRD. As shown as the following XRD figure, there are the same byproducts existed (Li<sub>3</sub>AlH<sub>6</sub>, Fe<sub>3</sub>O<sub>4</sub>, LiFeO<sub>2</sub>, etc.) with the 1, 2, 3 and 5 mol% CoFe<sub>2</sub>O<sub>4</sub> + LiAlH<sub>4</sub> ball milling samples after dehydrogenation, indicating that the increasing temperature inside the milling vial can facilitate the reaction between LiAlH<sub>4</sub> and CoFe<sub>2</sub>O<sub>4</sub>. In addition, the collision could not serve as the driving force for the reaction between LiAlH<sub>4</sub> and oxide, which are reported in the previous reports (*J. Phys. Chem. C*, 2011, **115**, 13088-13099).

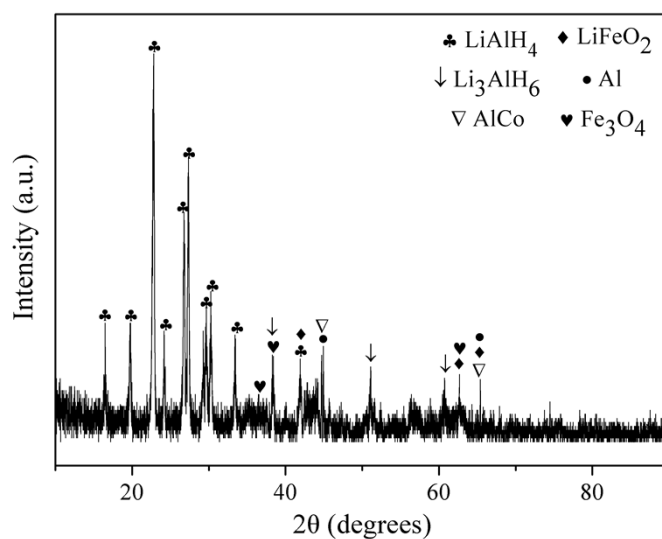

**Figure S1.** XRD pattern for the as-milled LiAlH<sub>4</sub> doped with CoFe<sub>2</sub>O<sub>4</sub> by using hand-milling method.
